# Supplementary material for: An organohydrogel with tunable fluorescence and shape-memory property for advanced anti-counterfeiting
Source: Royal Society of Chemistry journal article supplement (doi:10.1039/d4lp00003j), 2024-01-01
Supplement: d4lp00003j1.pdf [file d4lp00003j1.pdf]

## ***Supplementary Information***

### **Organohydrogel with Tunable Fluorescence and Shape-memory Property for Advanced Anti-counterfeiting**

Yu Sun,<sup>a,b</sup> Hui Shang,<sup>a,b</sup> Xiaoxia Le,<sup>\*,a,b</sup> and Tao Chen<sup>\*,a,b,c</sup>

<sup>a</sup>Y. Sun, H. Shang, X. Le, T. Chen: Key Laboratory of Marine Materials and Related Technologies, Zhejiang Key Laboratory of Marine Materials and Protective Technologies, Ningbo Institute of Material Technology and Engineering, Chinese Academy of Sciences, Ningbo 315201, China, E-mail: [lexiaoxia@nimte.ac.cn](mailto:lexiaoxia@nimte.ac.cn); [tao.chen@nimte.ac.cn](mailto:tao.chen@nimte.ac.cn)

<sup>b</sup>Y. Sun, H. Shang, X. Le, T. Chen: School of Chemical Science, University of Chinese Academy of Sciences, 19A Yuquan Road, Beijing 100049, China

<sup>c</sup>T. Chen: College of Material Chemistry and Chemical Engineering, Key Laboratory of Organosilicon Chemistry and Material Technology, Ministry of Education, Hangzhou Normal University, Hangzhou 311121, China

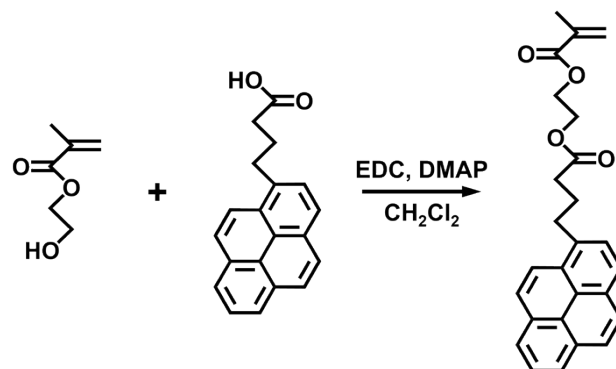

Fig. S1 The synthetic route of PyMA.

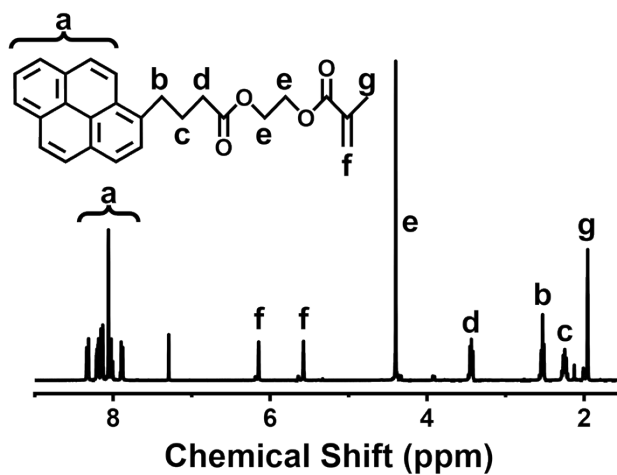

Fig. S2 The <sup>1</sup>H NMR spectrum of PyMA in CDCl<sub>3</sub>.

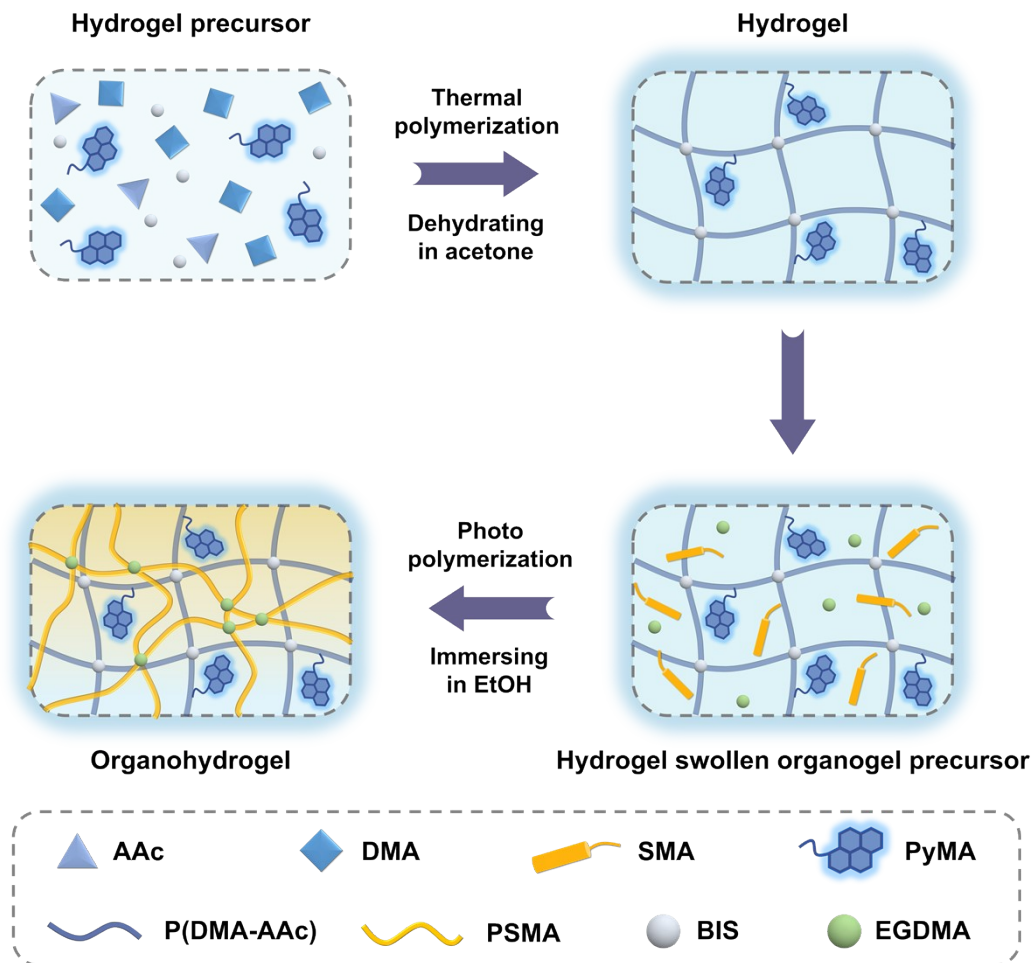

**Fig. S3** Schematic diagram of the preparation steps of P(DMA-AAc-PyMA)/PSMA organohydrogels.

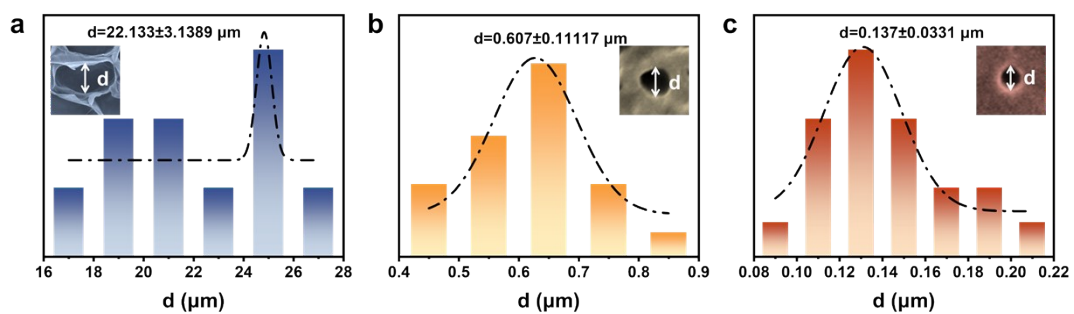

**Fig. S4** The size of porous structure of (a) P(DMA-AAc-PyMA) hydrogels and P(DMA-AAc-PyMA)/PSMA organohydrogels (b) before and (c) after  $\text{Fe}^{3+}$  treatment.

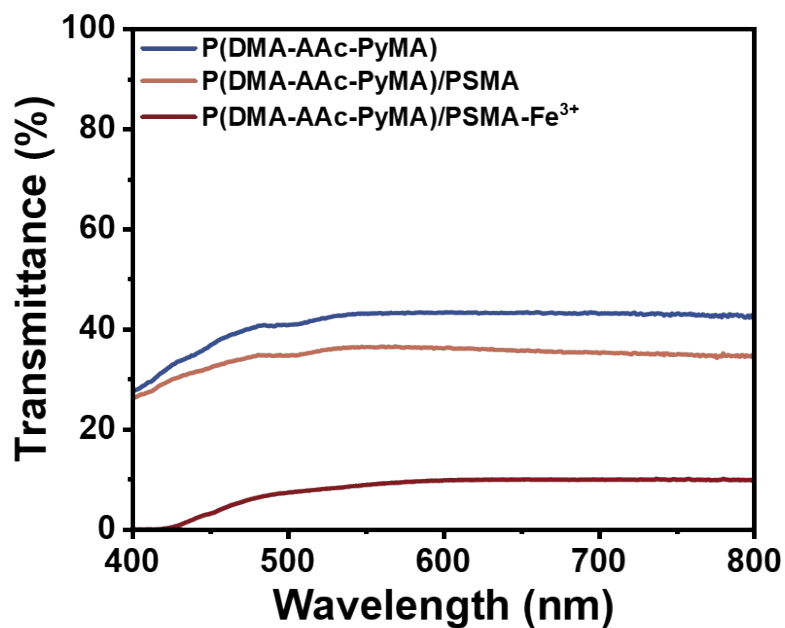

**Fig. S5** The transmittance of P(DMA-AAc-PyMA) hydrogels and P(DMA-AAc-PyMA)/PSMA organohydrogels before and after Fe<sup>3+</sup> treatment.

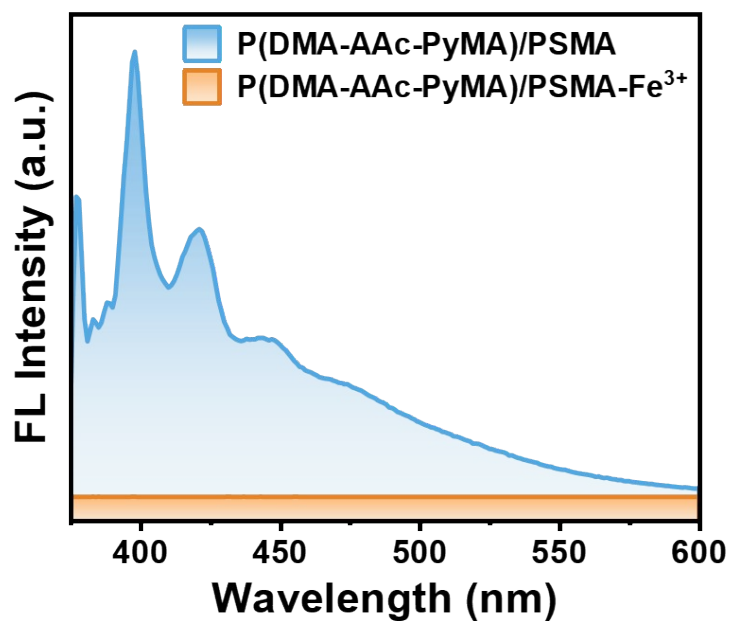

**Fig. S6** The fluorescence spectra of organohydrogels before and after Fe<sup>3+</sup> treatment (0.1 M, 24 h).

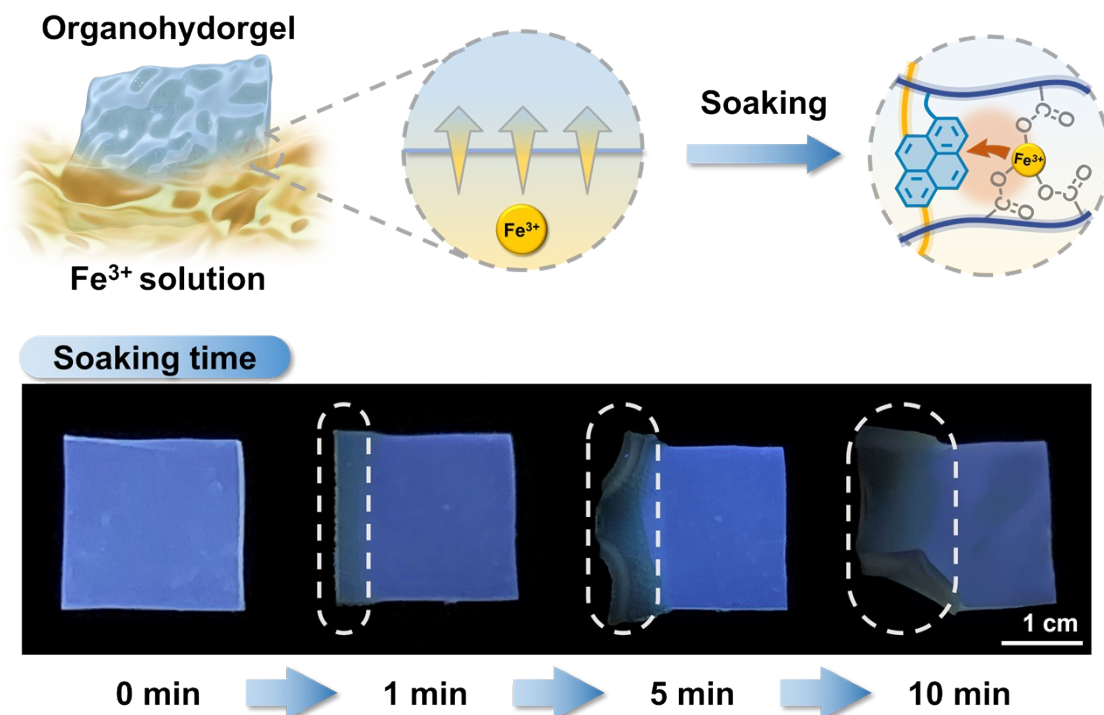

**Fig. S7** Schematic representation of organohydrogels immersed in  $\text{Fe}^{3+}$  solution (0.1 M) and digital photos of the organohydrogels with immersion time (scale bar: 1 cm).

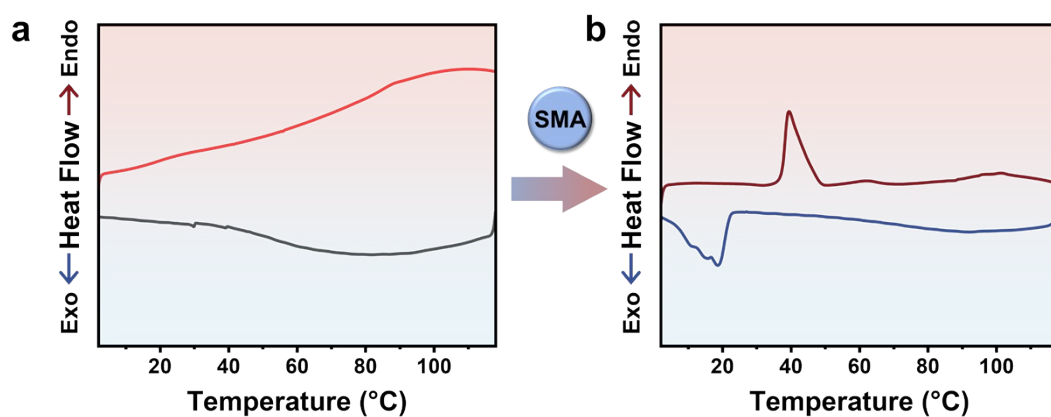

**Figure S8.** DSC curve of (a) P(DMA-AAc-PyMA) hydrogels and (b) P(DMA-AAc-PyMA)/PSMA organohydrogels at the heating rate of 10 °C/min.
